# Supplementary material for: Guggulsterone Induces Apoptosis in Multiple Myeloma Cells by Targeting High Mobility Group Box 1 via Janus Activated Kinase/Signal Transducer and Activator of Transcription Pathway
Source: MDPI journal article supplement (doi:10.3390/cancers14225621), 2022-11-16

RPMI 8226

Figure S3E

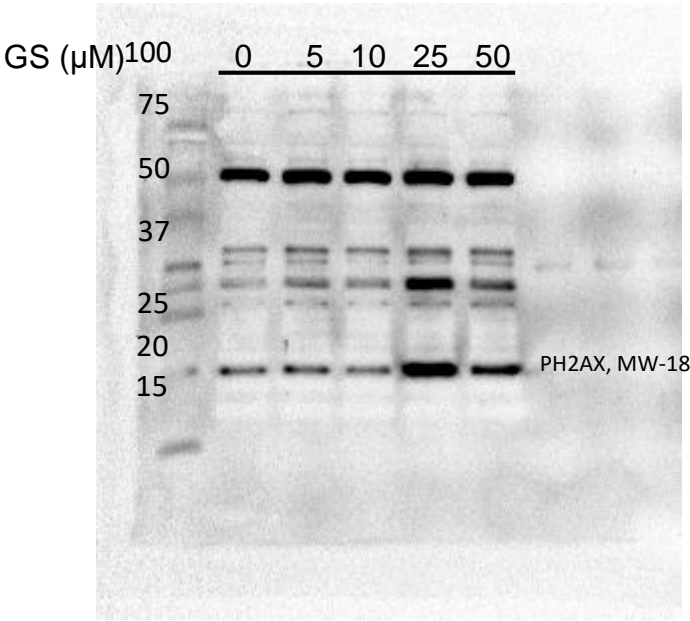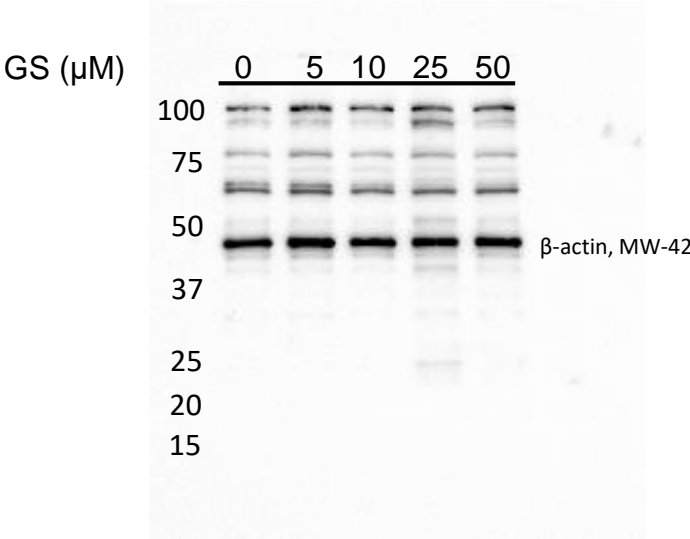

U266

Figure S3D

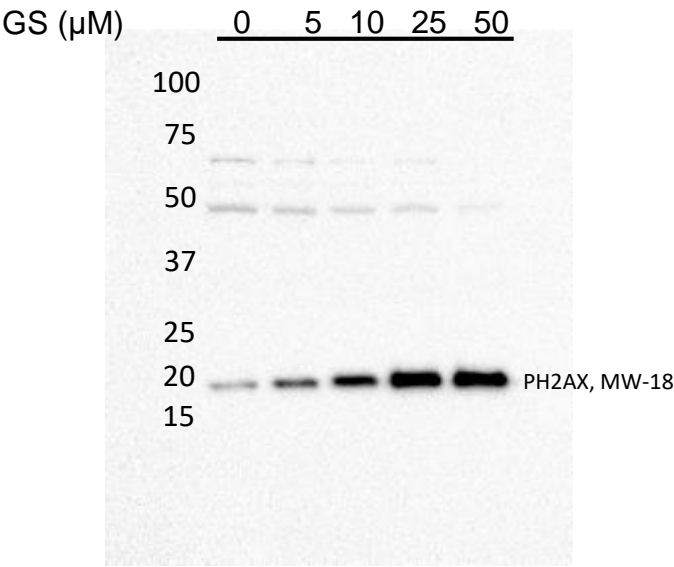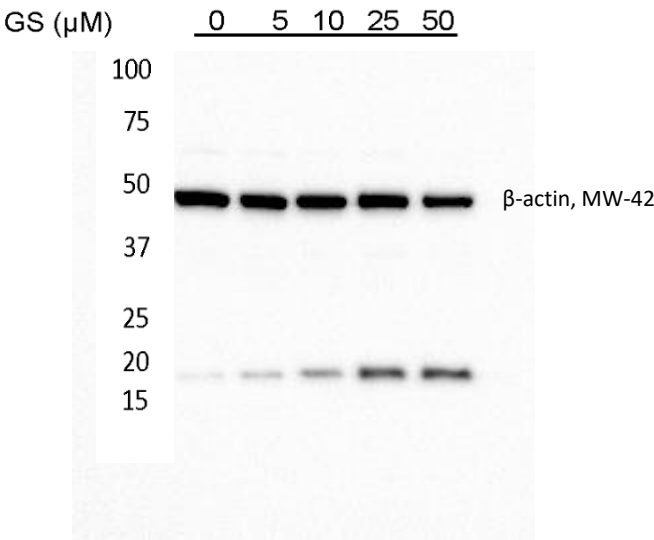

U266

Fig 4A

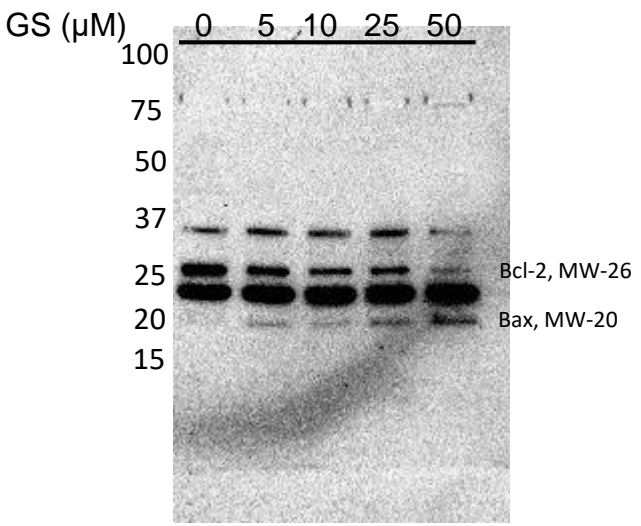

U266

Fig 4C

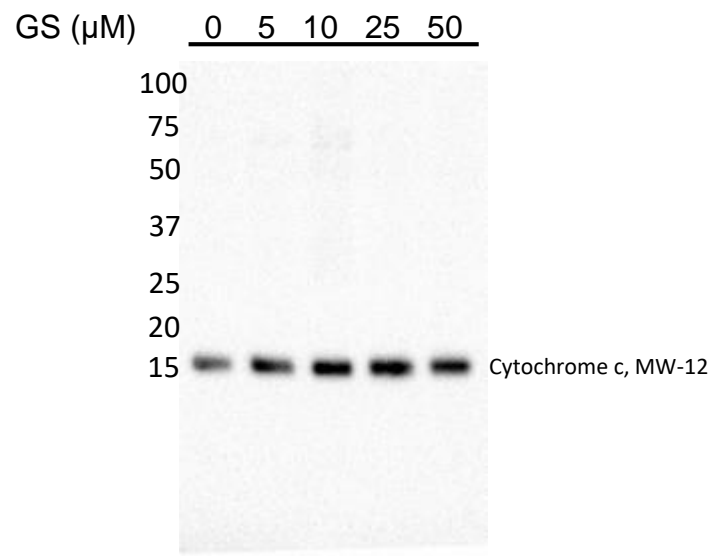

U266

Fig 4D

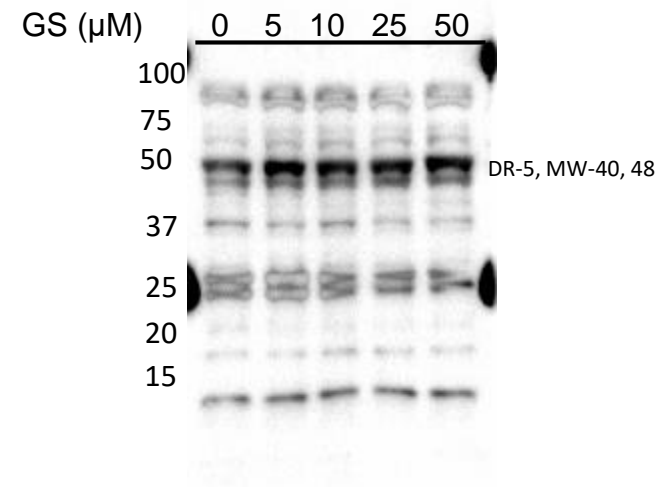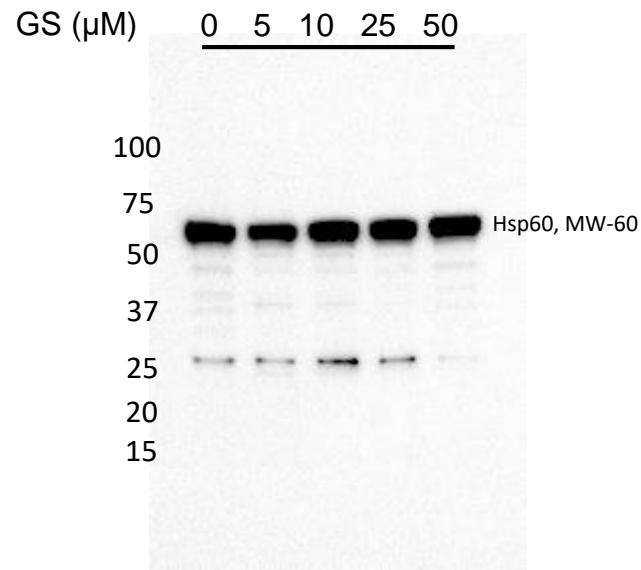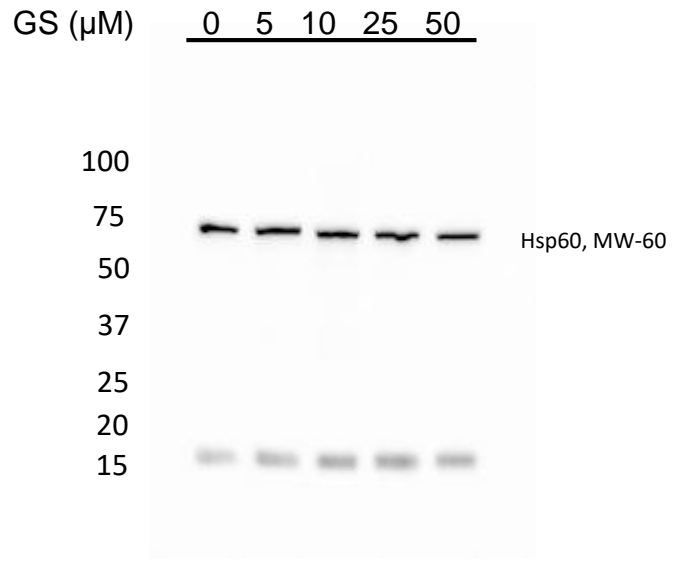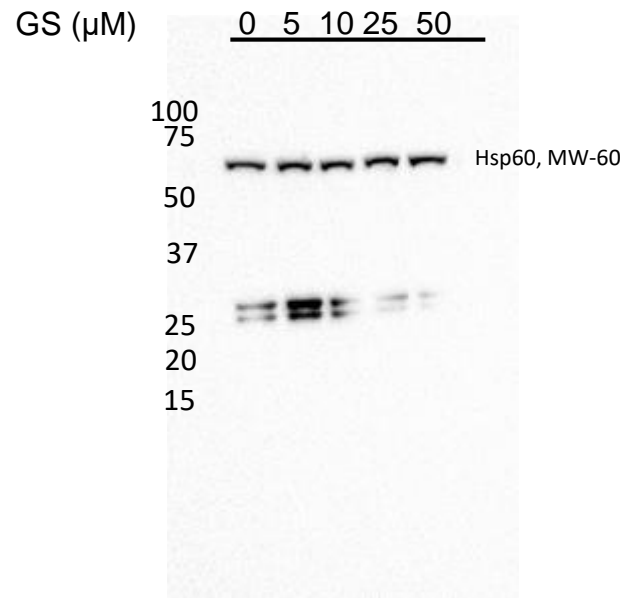

RPMI 8226

Fig 4E

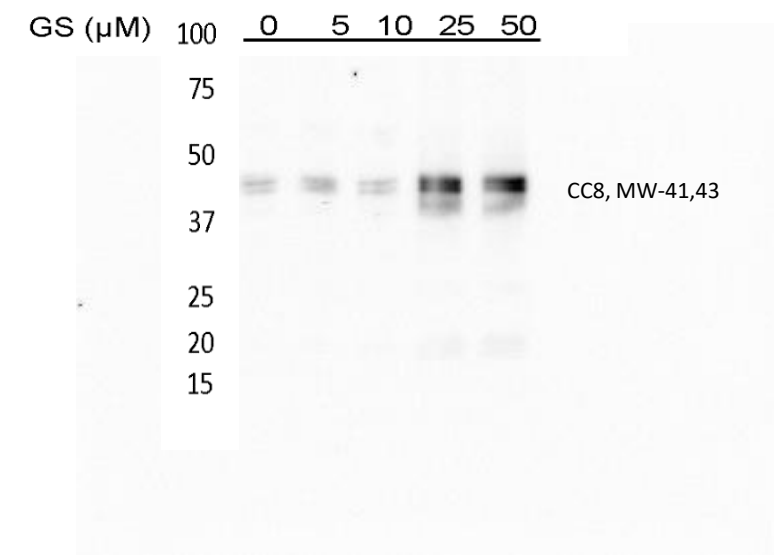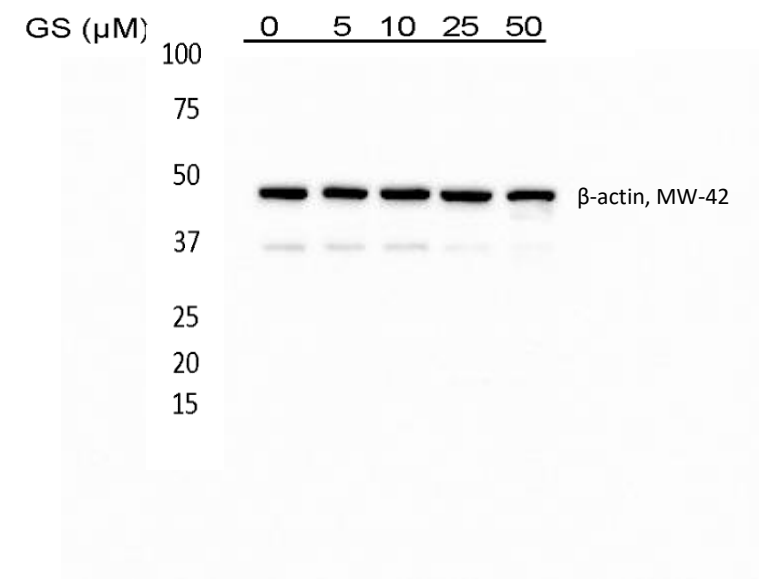

U266

Fig 4D

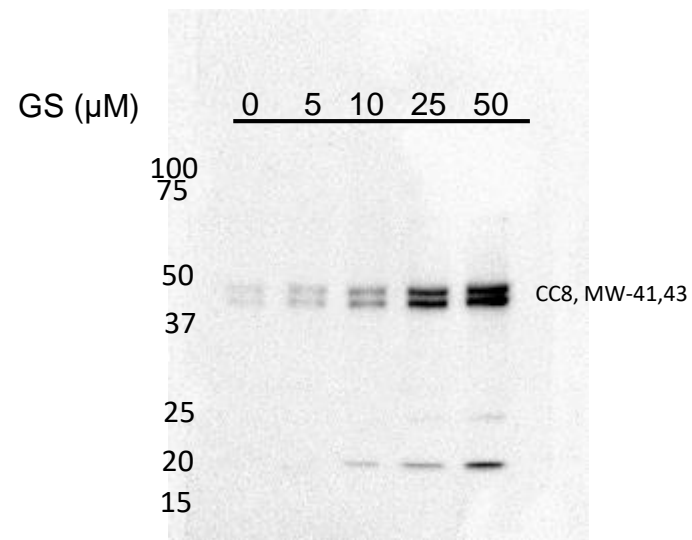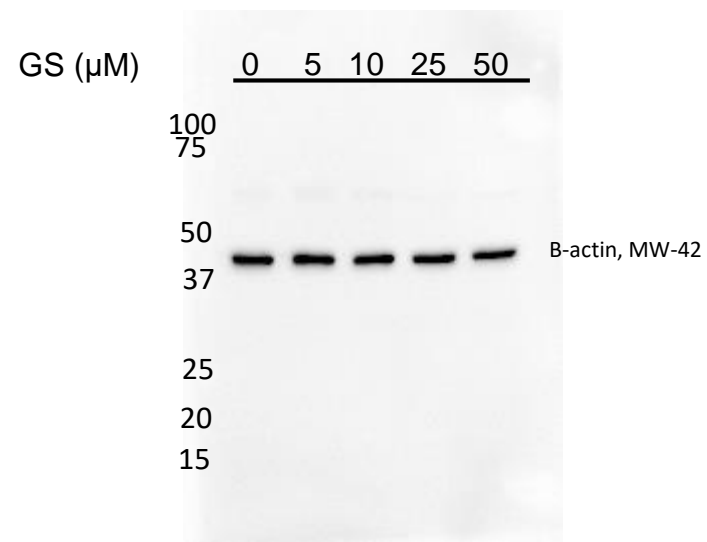

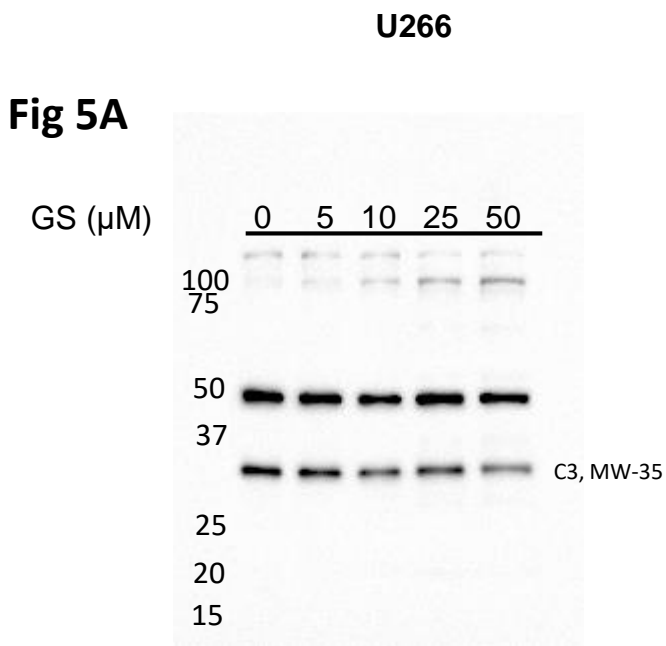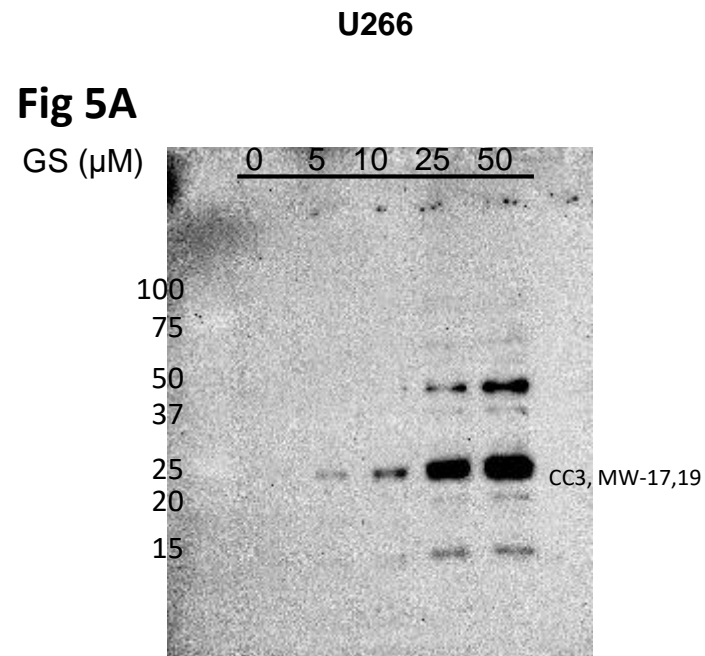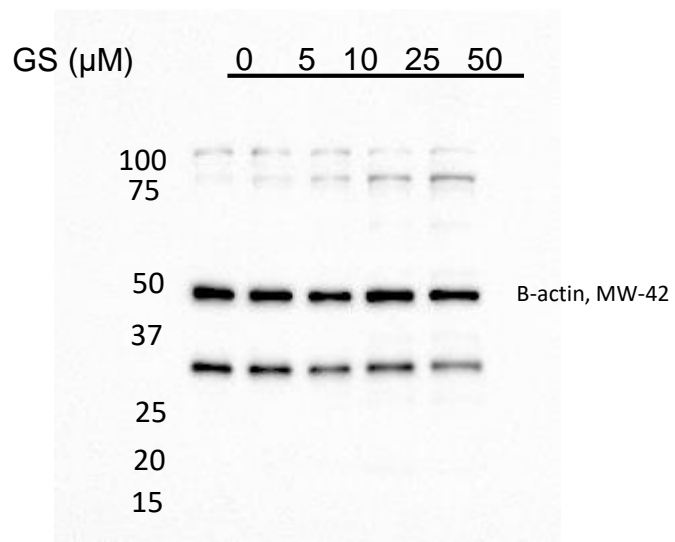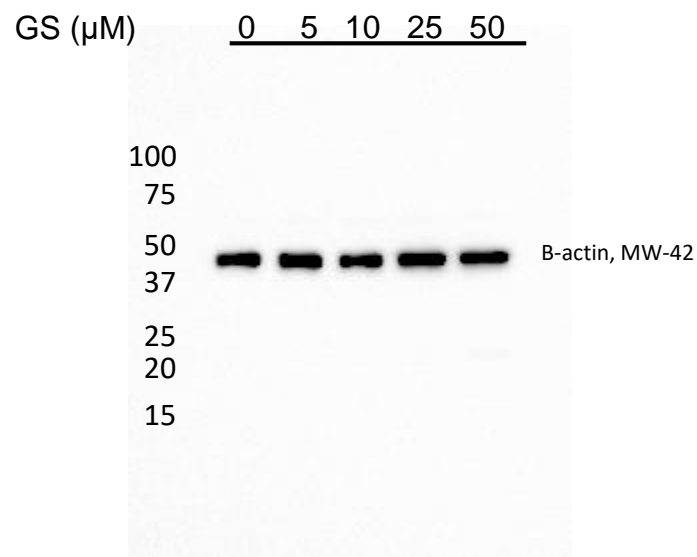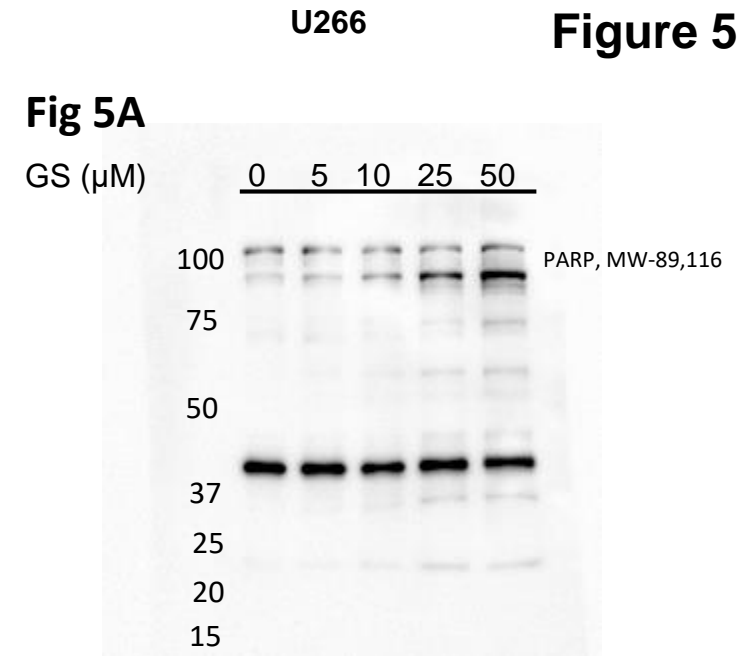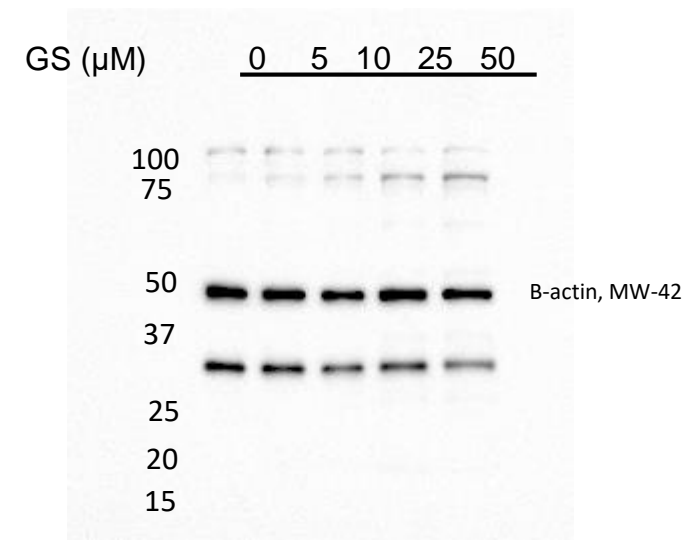

Fig 5B

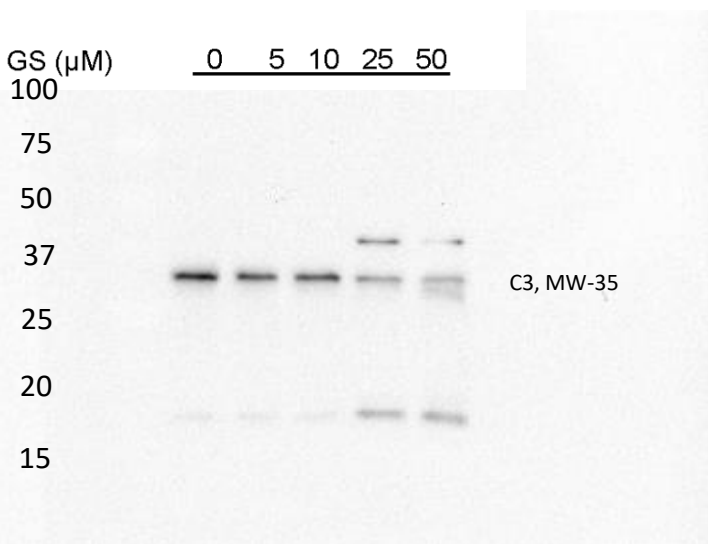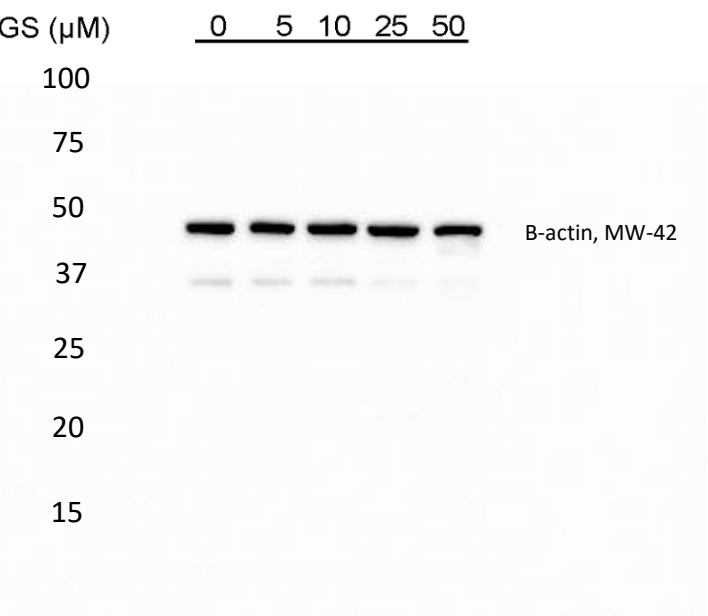

Fig 5B

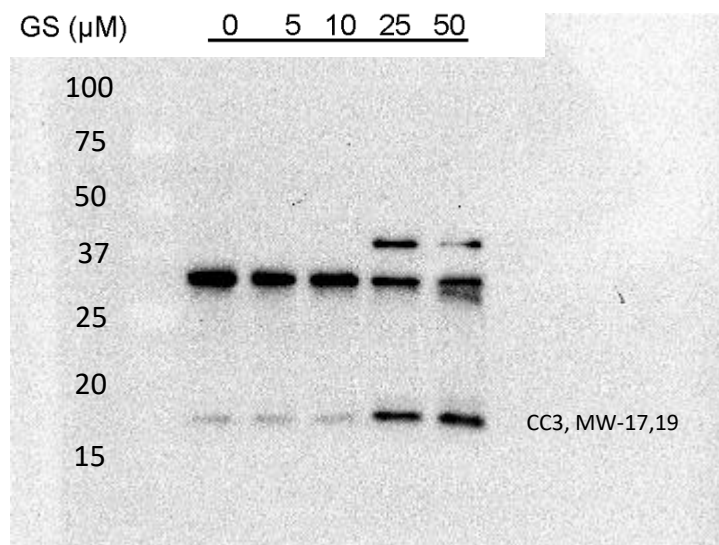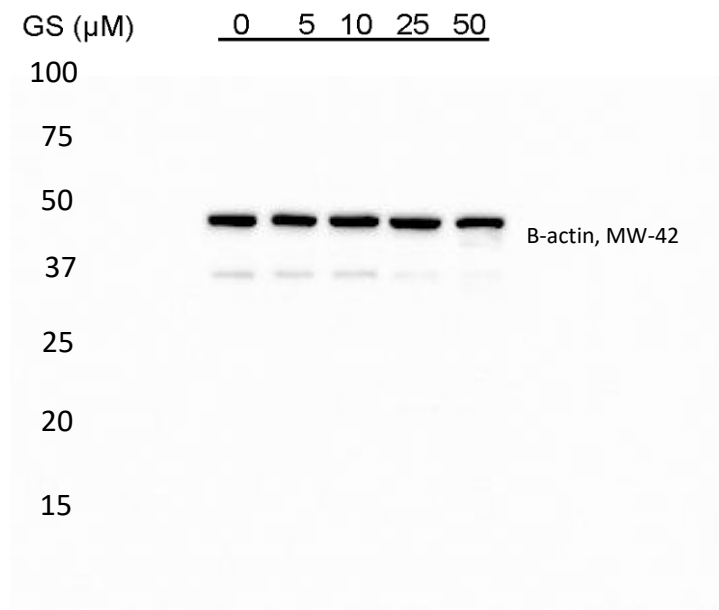

Fig 5B

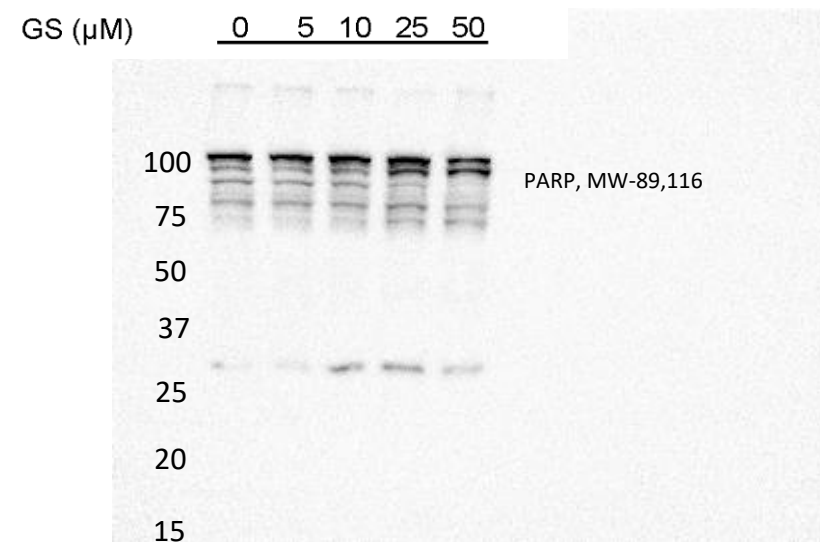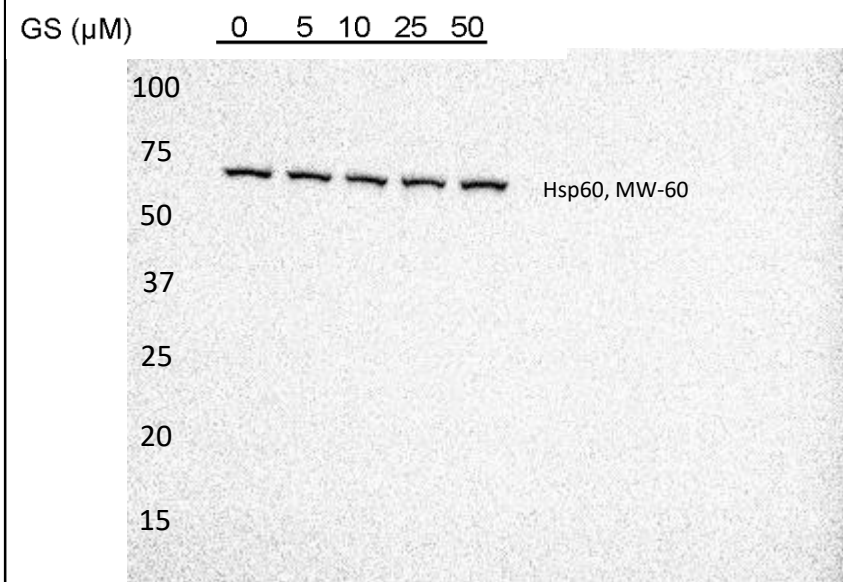

Fig 5E

U266

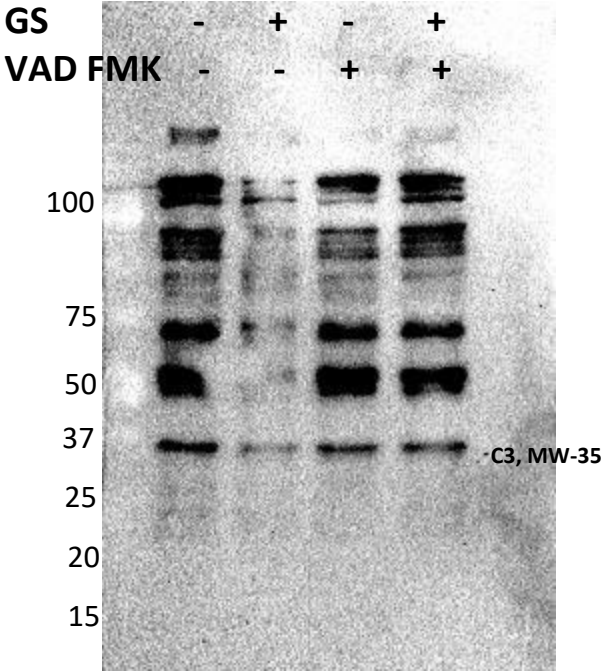

Fig 5E

U266

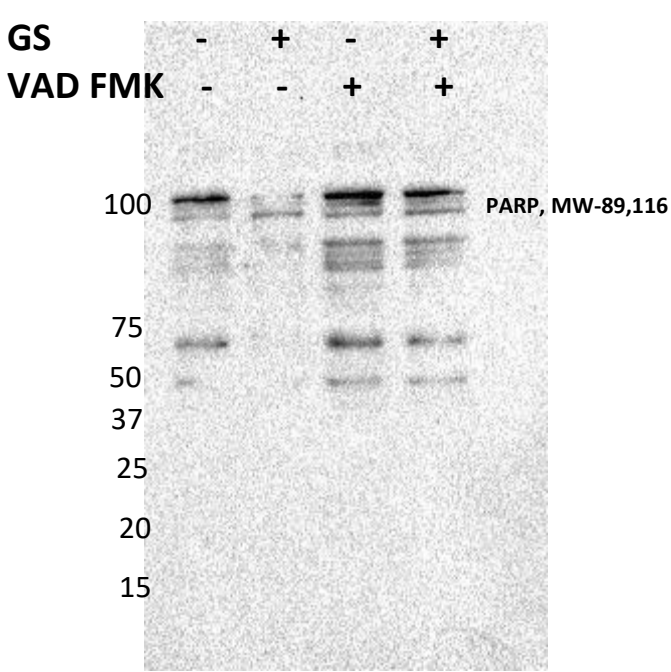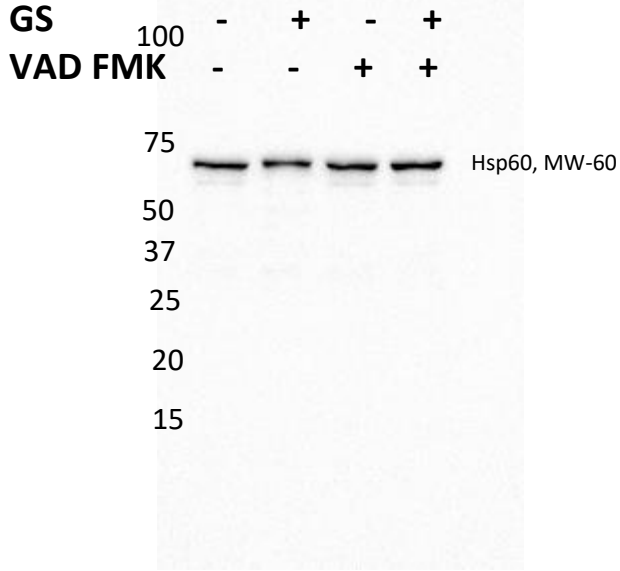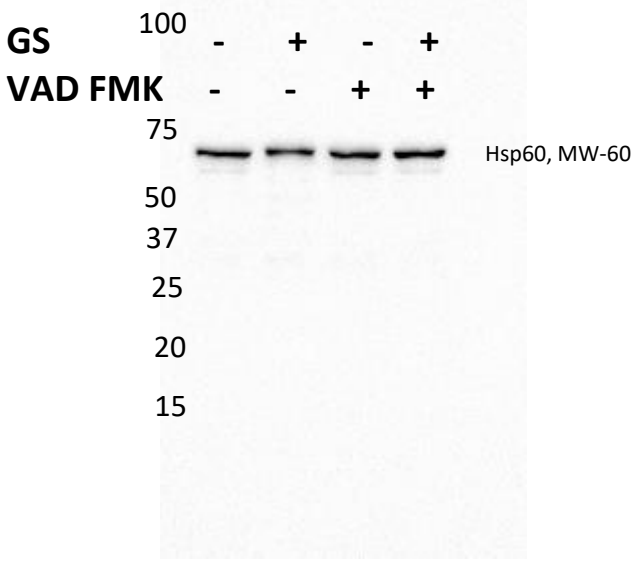

U266

Fig 6B

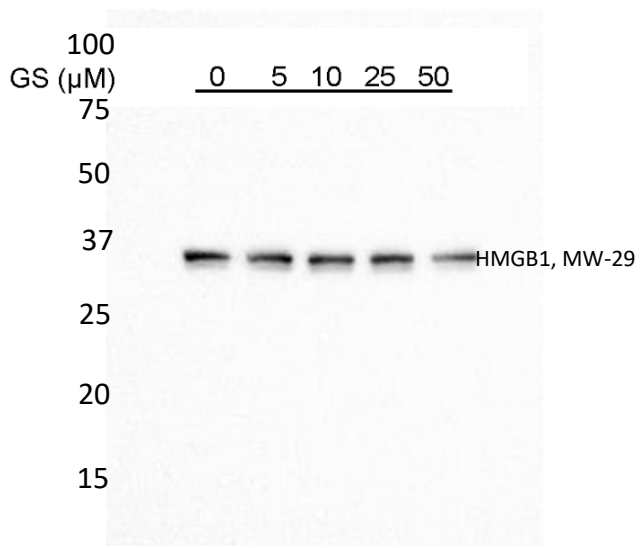

RPMI 8226

Fig 6C

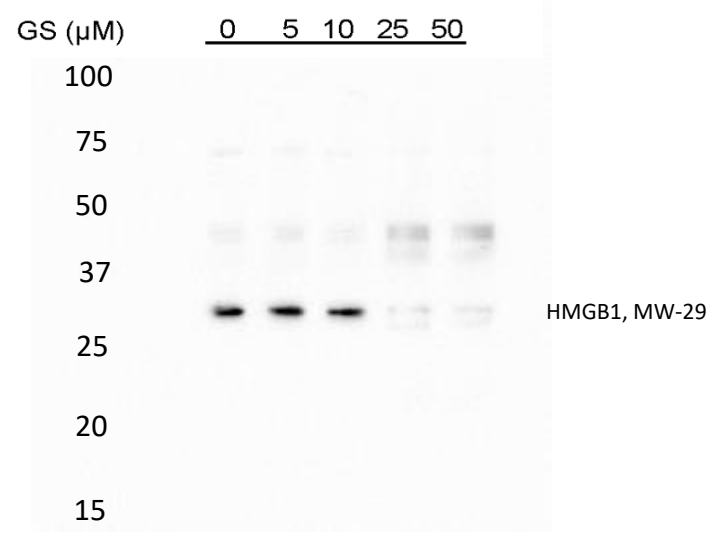

U266

Fig 6D

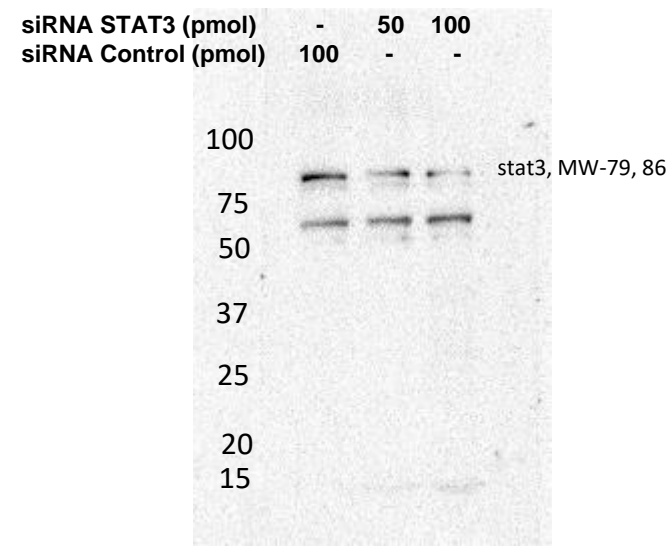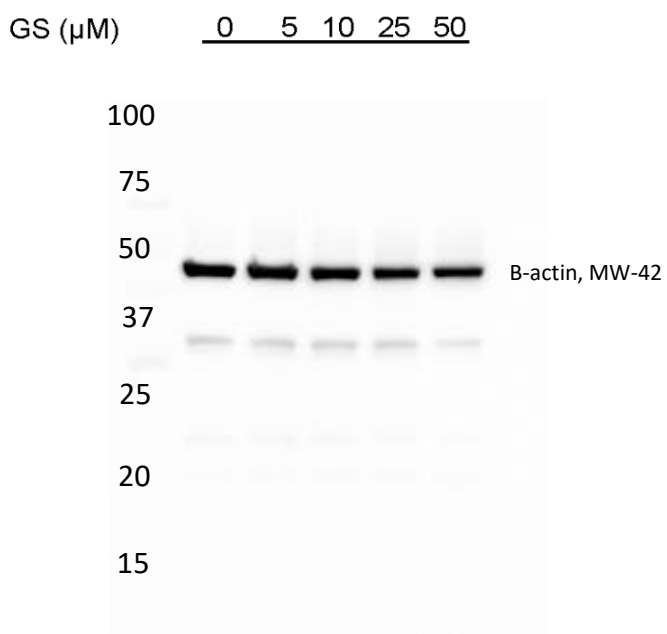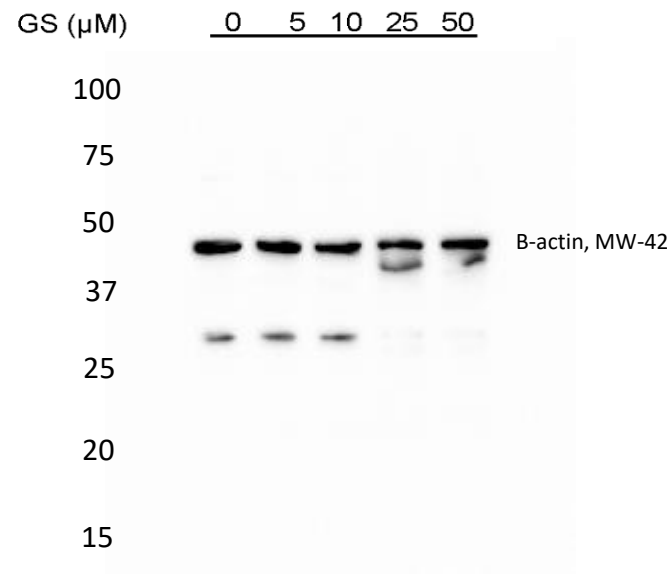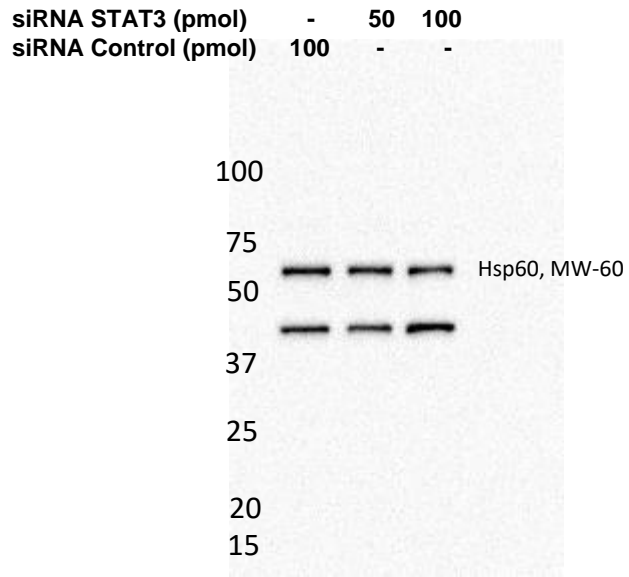

Fig 6D

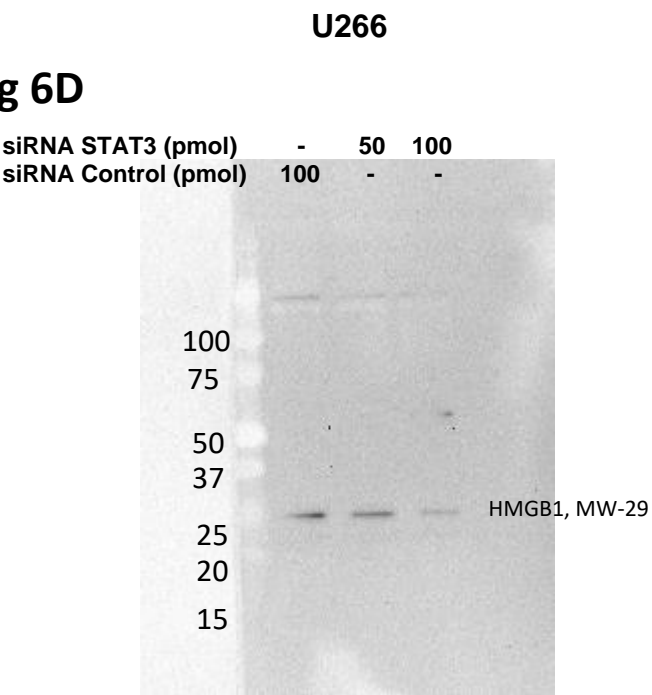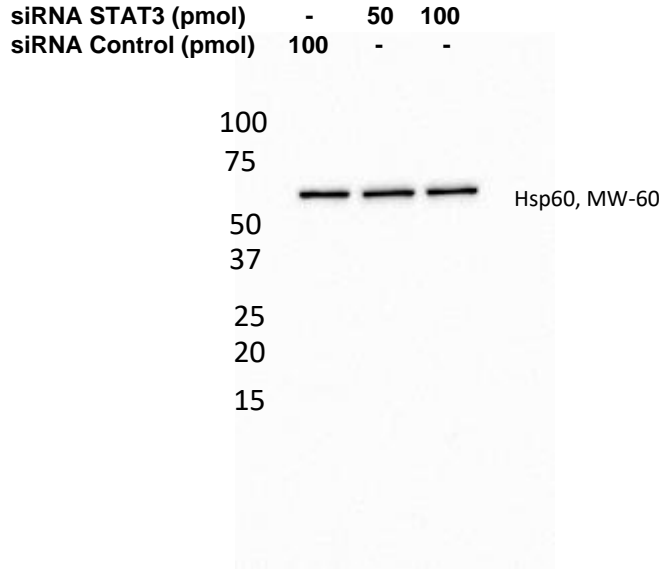

Fig 6D

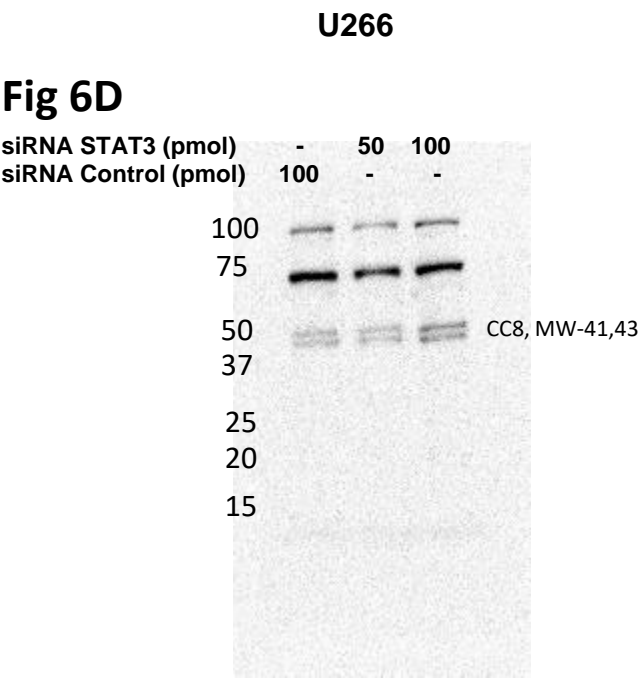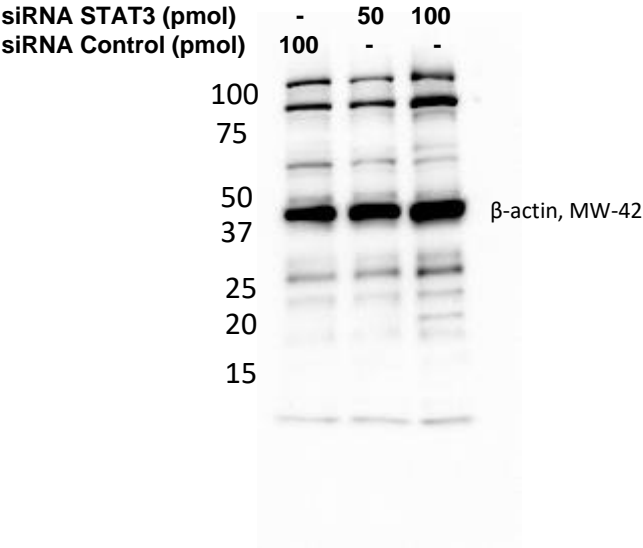



U266

Fig 6F

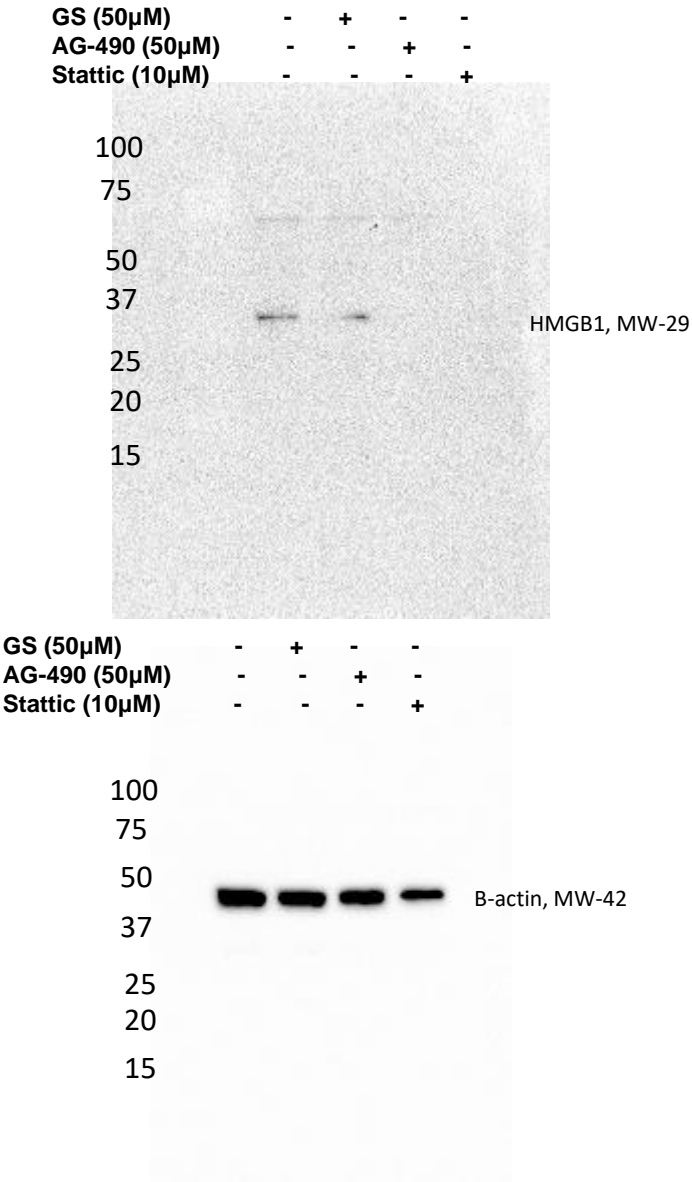

U266

Fig 6F

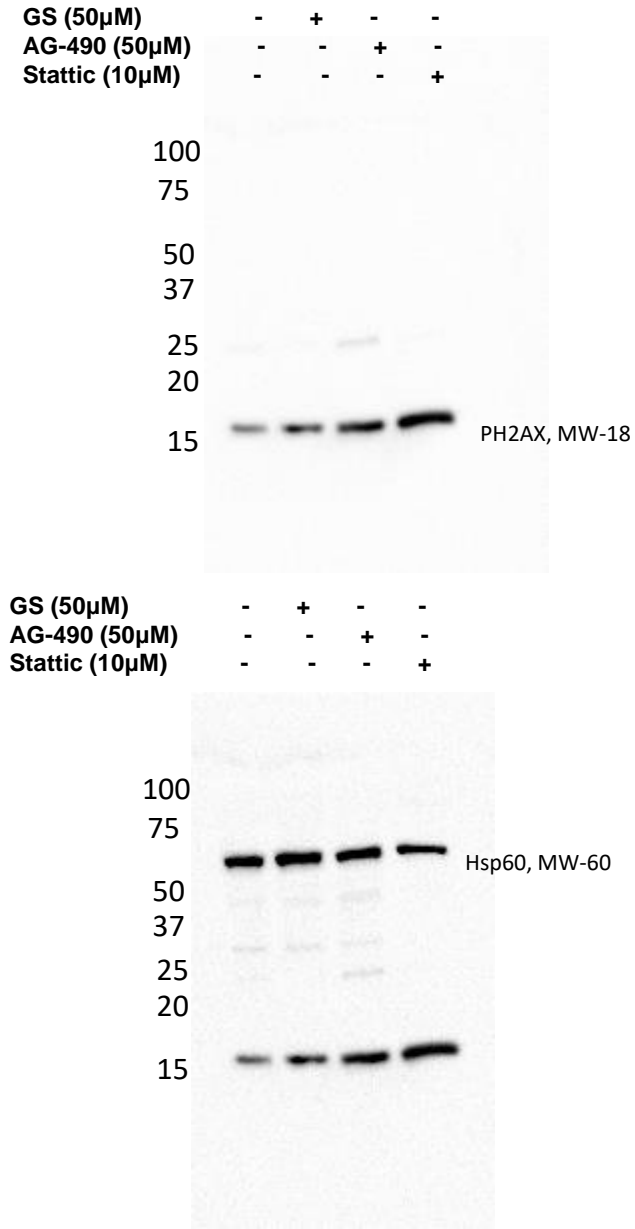

Figure 6

U266

Fig 7A

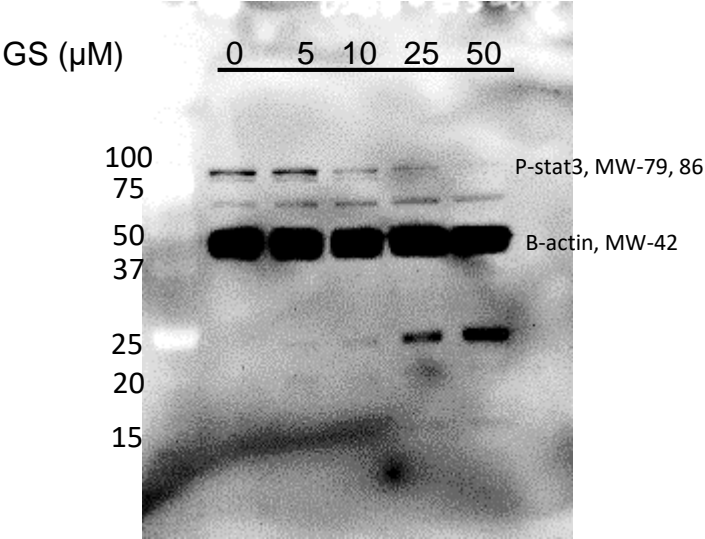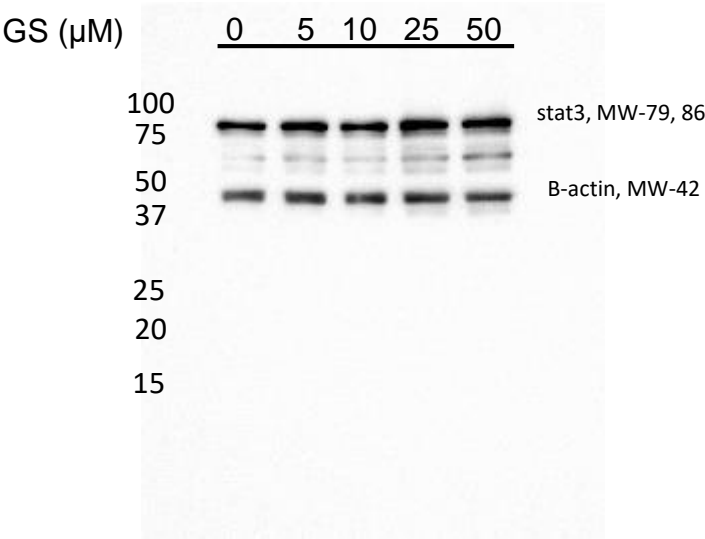

U266

Fig 7A

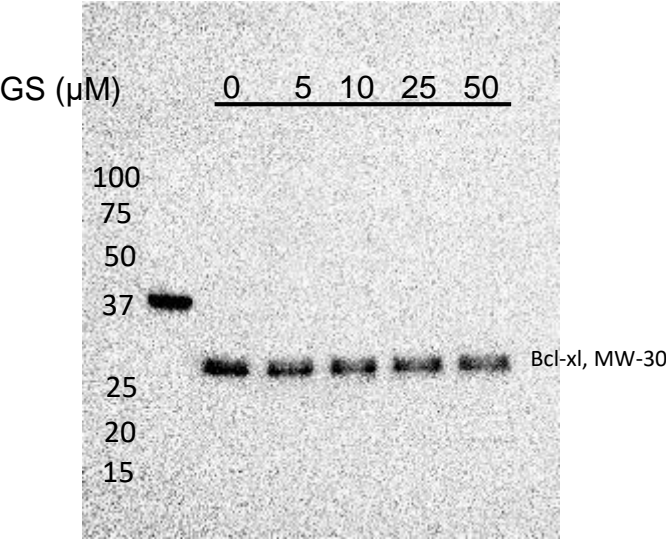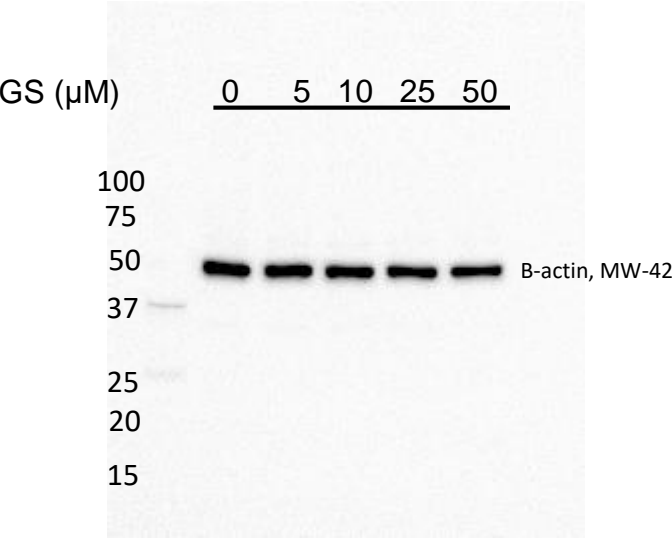

U266

Figure 7

Fig 7A

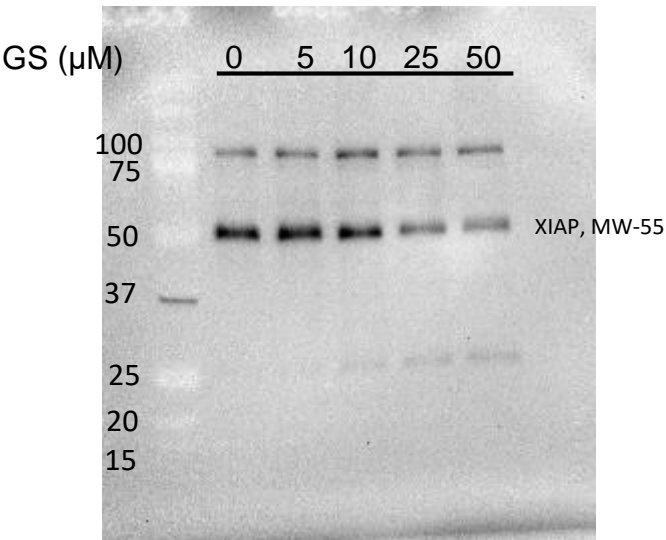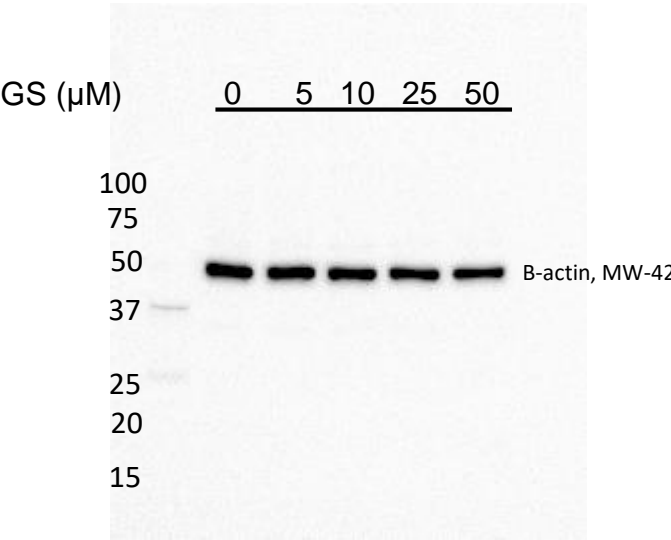

U266

**Fig 7A**

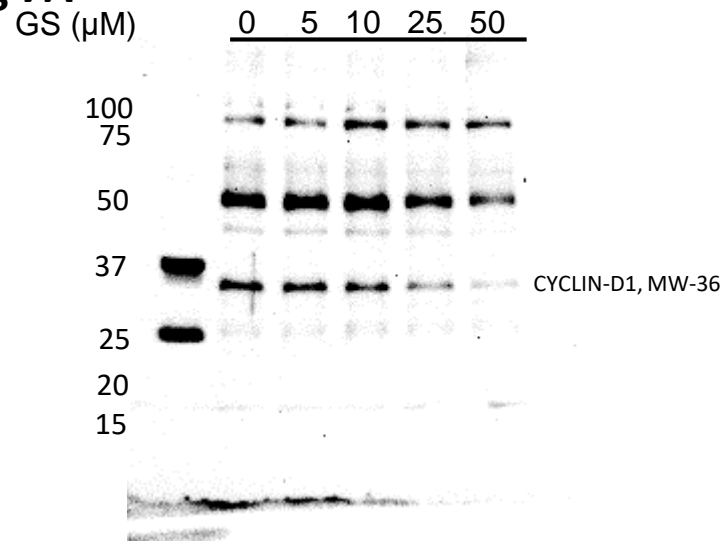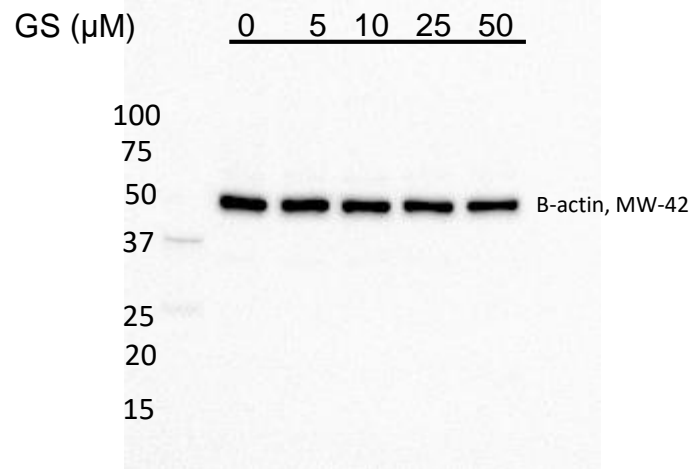

**Fig 7A**

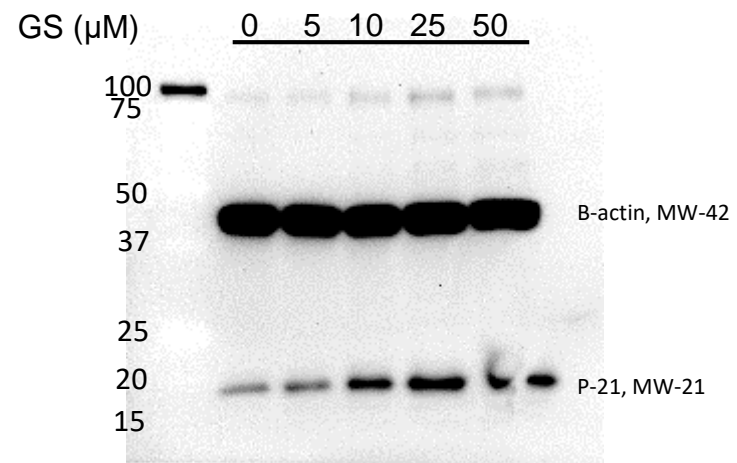

U266

**Fig 7A**

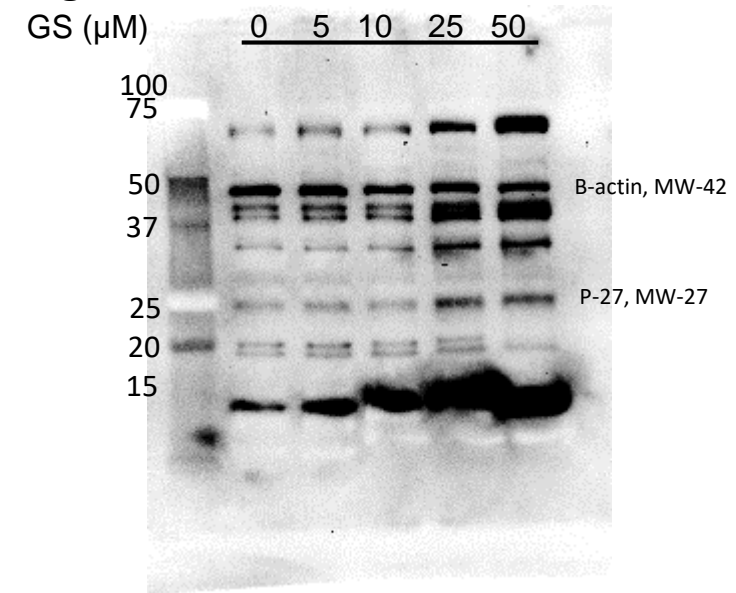

**Figure 7**

Fig 7C

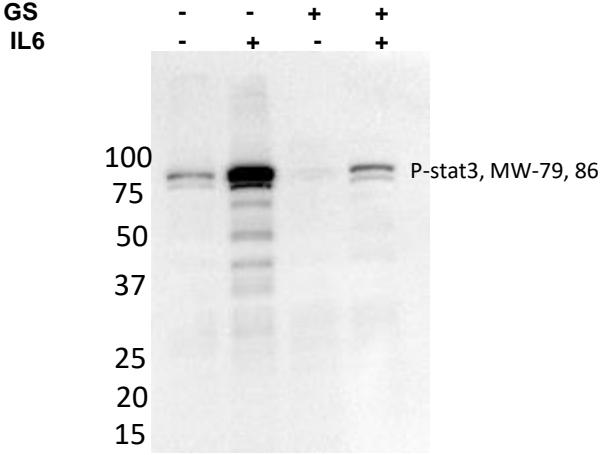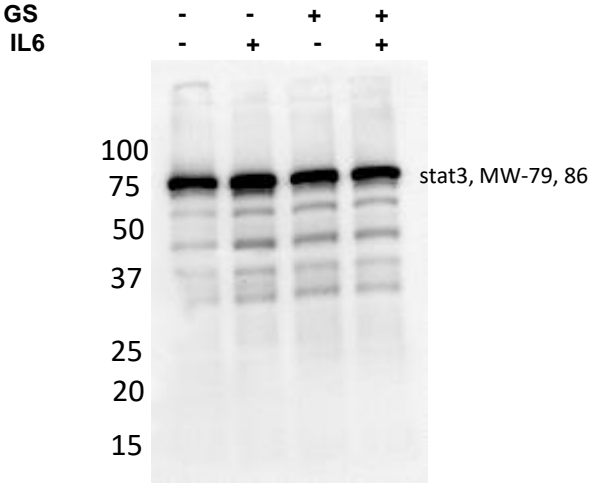

Fig 7C

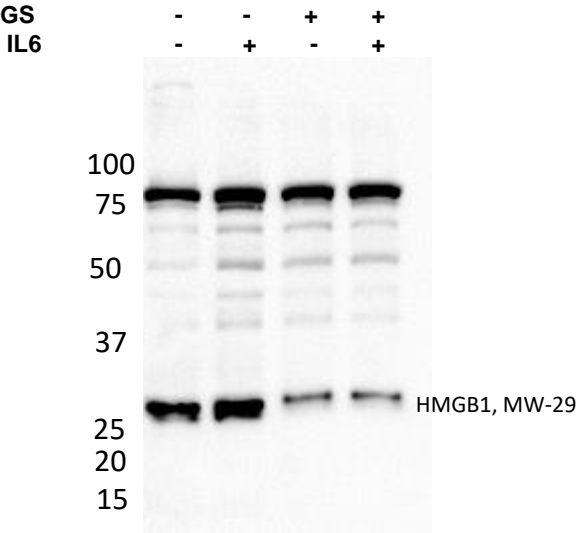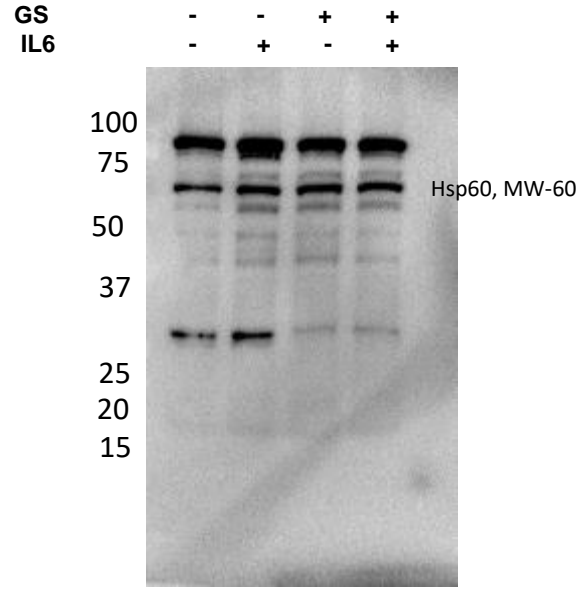

RPMI 8226

Fig 7D

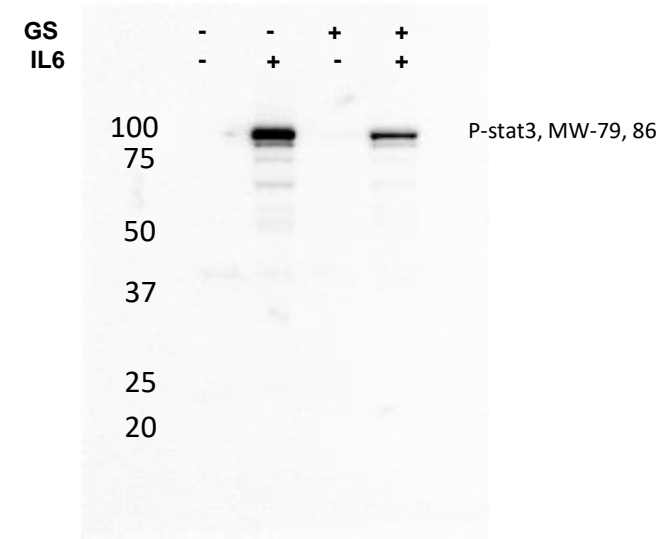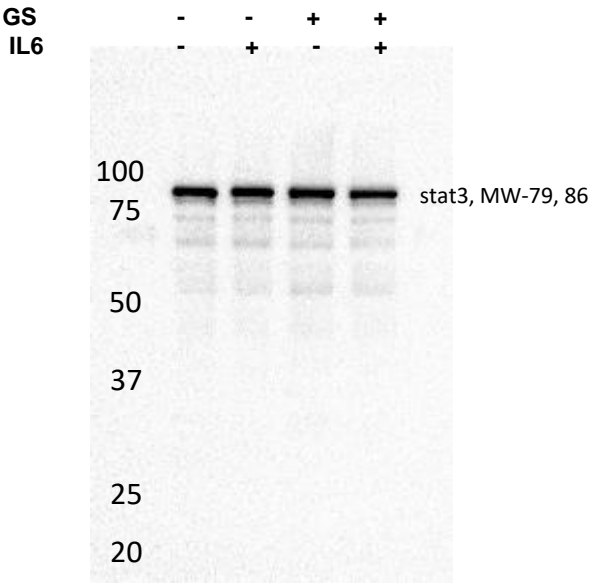

U266

Fig 7E

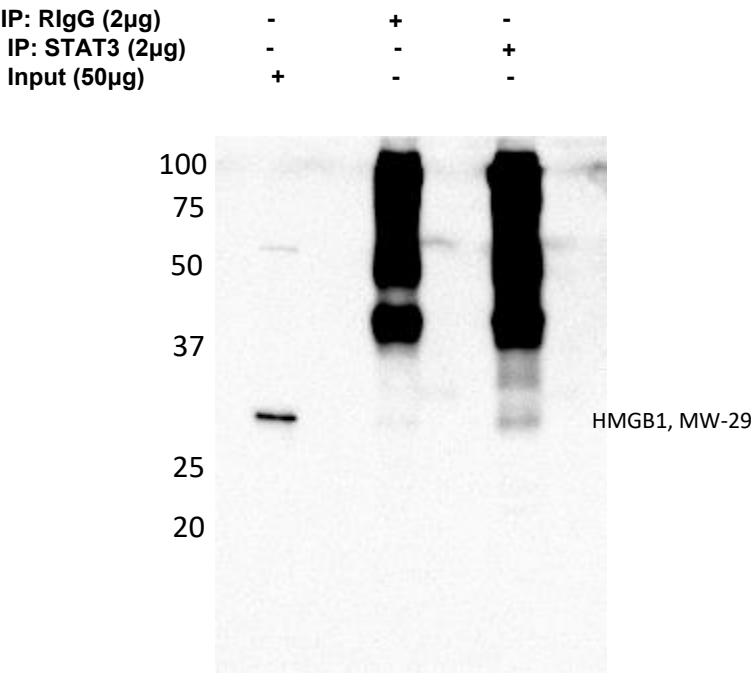

Fig 9B

U266

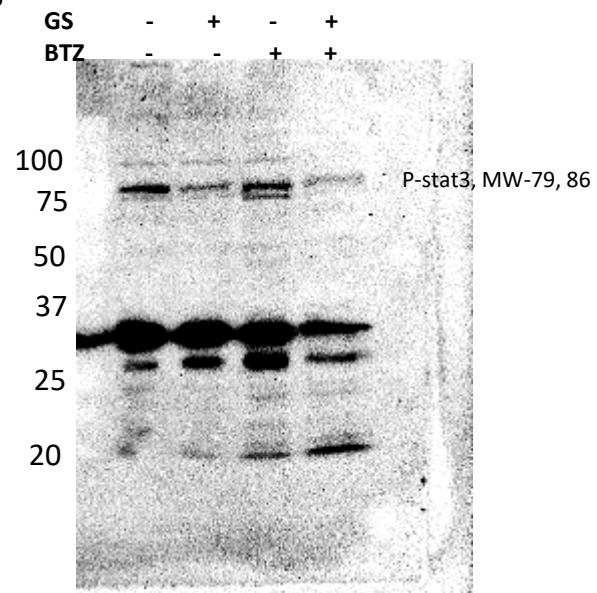

Fig 9B

U266

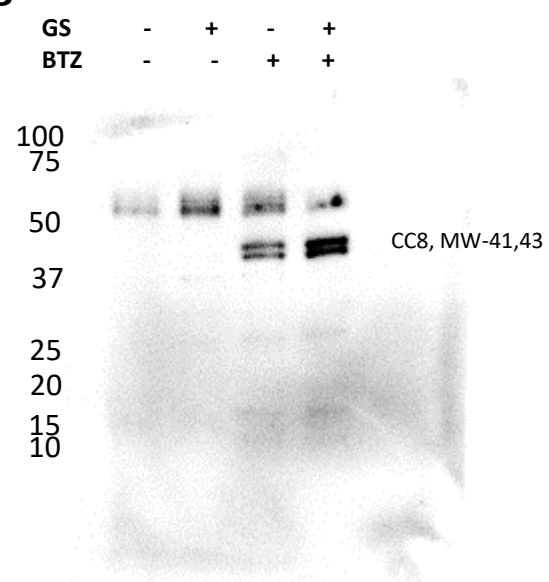

Fig 9B

U266

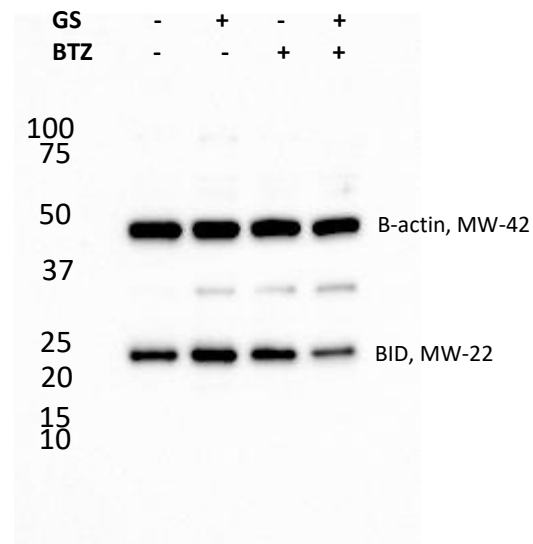

Figure 9

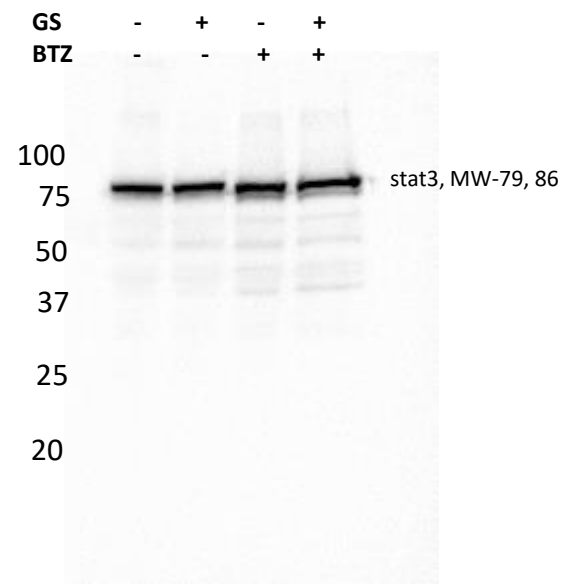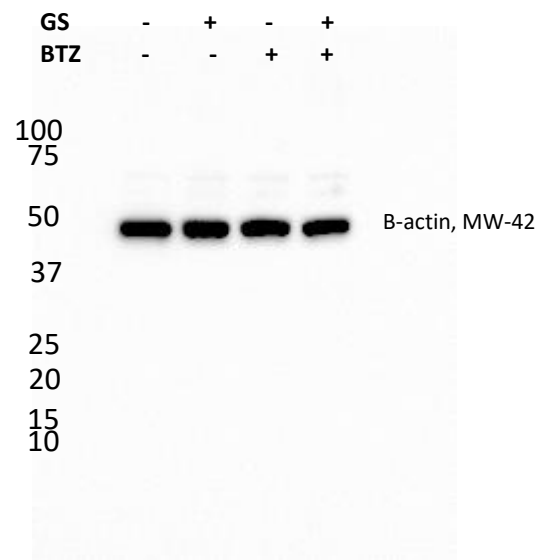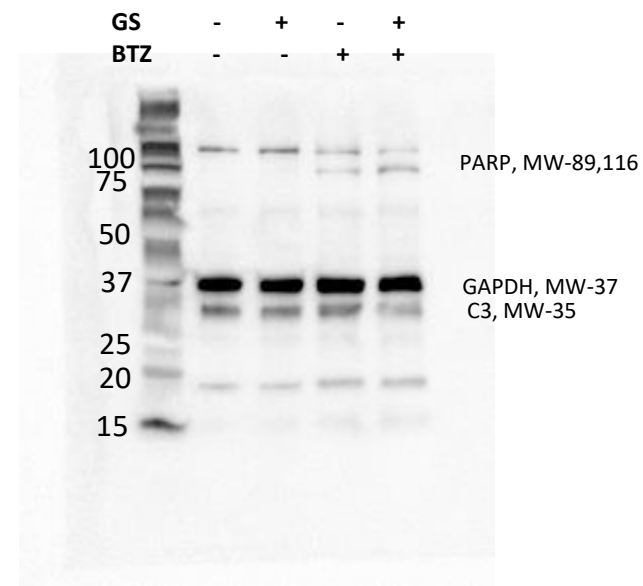

U266

Fig 9B

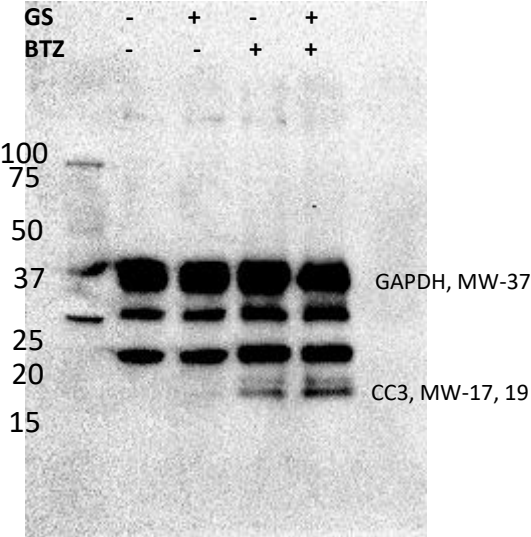

U266

Fig 9B

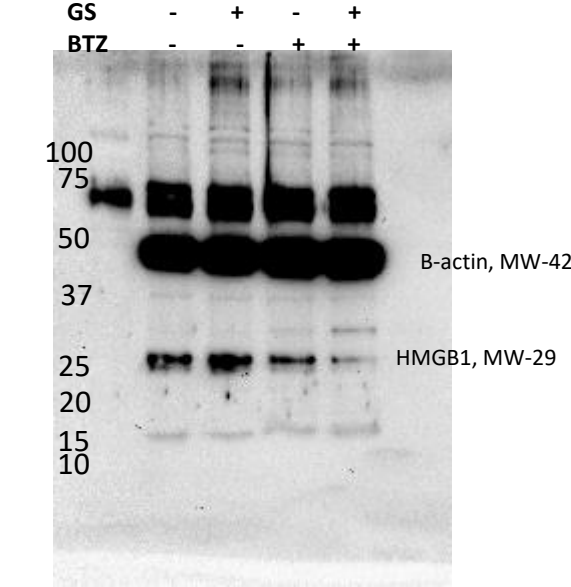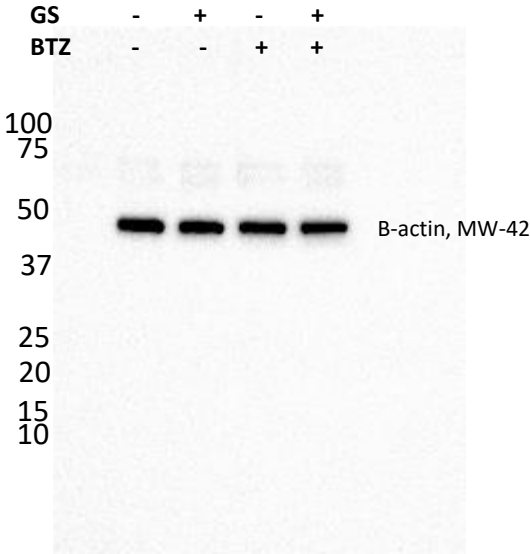

Figure 9

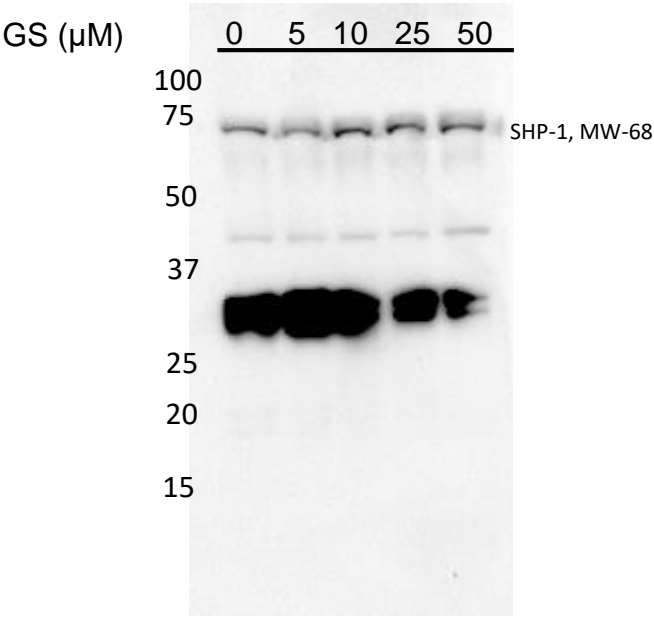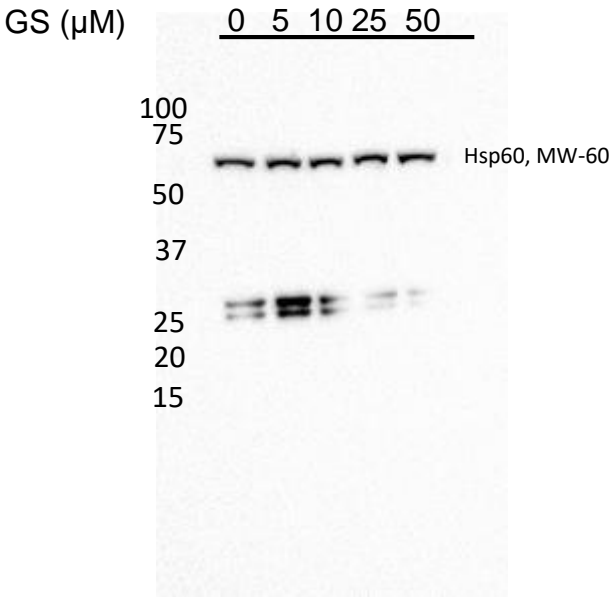

Supplement: s1 [file s1]
